# Supplementary material
Source: PubMed Central journal article supplement (PMC6437029)
Supplement: mmc1.pdf [file mmc1.pdf]

# A Simple Clinical Risk Score (C<sub>2</sub>HES<sub>T</sub>) for Predicting Incident Atrial Fibrillation in Asian Subjects

Derivation in 471,446 Chinese Subjects, With Internal Validation and External Application in 451,199 Korean Subjects

*Yan-Guang Li, MD, PhD; Daniele Pastori, MD, PhD; Alessio Farcomeni, PhD; Pil-Sung Yang, MD; Eunsun Jang, MD; Boyoung Joung, MD, PhD; Yu-Tang Wang, MD, PhD; Yu-Tao Guo, MD, PhD; and Gregory Y. H. Lip, MD*

CHEST 2019; 155(3):510-518

*Online supplements are not copyedited prior to posting and the author(s) take full responsibility for the accuracy of all data.*

© 2018 AMERICAN COLLEGE OF CHEST PHYSICIANS. Reproduction of this article is prohibited without written permission from the American College of Chest Physicians. See online for more details. DOI: 10.1016/j.chest.2018.09.011

## e-Appendix 1.

AF was diagnosed upon an ECG or Holter recording (ICD-9 codes: 427.31 or ICD10 codes: I48). Rheumatic valvular disease (ICD-9 codes: 393-398; ICD-10 codes: I05, I06, I07, I09.9), dilated cardiomyopathy (ICD-9 codes: 425.4; ICD-10 codes: I42.0), HF (ICD-9 codes: 428; ICD-10 codes: I42, I50, I110, I819), CAD (ICD-9 codes: 410-414; ICD-10 codes: I20-I25), hyperthyroidism (ICD-9 codes: 242; ICD-10 codes: E05), hypothyroidism (ICD-9 codes: 244; ICD-10 codes: E03), COPD (ICD-9 codes: 490-496; ICD-10 codes: J42, J44.0-9), hypertension (ICD-9 codes: 401-405; ICD-10 codes: I10-I15), renal dysfunction (ICD-9 codes: 585, 586; ICD-10 codes: M1A.3), IS (ICD-9 codes: 436; ICD-10 codes: I63), hyperlipidemia (ICD-9 codes: 272.4; ICD-10 codes: E78.0-3, E78.5), myocardial infarction (ICD-9 codes: 410; ICD-10 codes: I21, I22), peripheral vascular disease (ICD-9 codes: 440.2; ICD-10 codes: I65, I70-74), diabetes mellitus (ICD-9 codes: 249-250; ICD-10 codes: E10-E14).

**e-Table 1. Baseline characteristics of subjects in the validation cohort**

| Characteristics                                               | Total subjects<br>(n=451,199) | Subjects<br>without AF<br>(n=439,056) | Subjects with<br>incident AF<br>(n=12,143) | P<br>value |
|---------------------------------------------------------------|-------------------------------|---------------------------------------|--------------------------------------------|------------|
| <b>Age, mean (SD), y</b>                                      | 56.1 (9.3)                    | 55.9 (9.3)                            | 62.3 (9.9)                                 | <0.001     |
| <b>Male sex, No. (%)</b>                                      | 243,503 (54.0)                | 236220 (53.8)                         | 7283 (60.0)                                | <0.001     |
| <b>Comorbidities</b>                                          |                               |                                       |                                            |            |
| <b>Hypertension</b>                                           | 143,168 (31.7)                | 136586 (31.1)                         | 6582 (54.2)                                | <0.001     |
| <b>Diabetes mellitus</b>                                      | 37,372 (8.3)                  | 35752 (8.1)                           | 1620 (13.3)                                | <0.001     |
| <b>Coronary artery disease</b>                                | 9,946 (2.2)                   | 9029 (2.1)                            | 917 (7.6)                                  | <0.001     |
| <b>Hyperlipidemia</b>                                         | 45,012 (10.0)                 | 43234 (9.8)                           | 1778 (14.6)                                | <0.001     |
| <b>Vascular disease</b>                                       | 13,656 (3.0)                  | 12837 (2.9)                           | 819 (6.7)                                  | <0.001     |
| <b>COPD</b>                                                   | 44,470 (9.9)                  | 42120 (9.6)                           | 2350 (19.4)                                | <0.001     |
| <b>Previous ischemic stroke</b>                               | 14,980 (3.3)                  | 14072 (3.2)                           | 908 (7.5)                                  | <0.001     |
| <b>Renal dysfunction</b>                                      | 3,461 (0.8)                   | 3267 (0.7)                            | 194 (1.6)                                  | <0.001     |
| <b>Systolic heart failure</b>                                 | 5,515 (1.2)                   | 5082 (1.2)                            | 433 (3.6)                                  | <0.001     |
| <b>Thyroid disease</b>                                        | 2,477 (0.6)                   | 2382 (0.5)                            | 95 (0.8)                                   | <0.001     |
| <b>CHA<sub>2</sub>DS<sub>2</sub>-VASc score, median (IQR)</b> | 0 (0-1)                       | 0 (0-1)                               | 1 (0-2)                                    | <0.001     |
